# Supplementary material for: Impacts of obesity, maternal obesity and nicotinamide mononucleotide supplementation on sperm quality in mice
Source: PubMed Central journal article supplement (PMC6589912; doi:10.1530/rep-18-0574), 2019-05-30

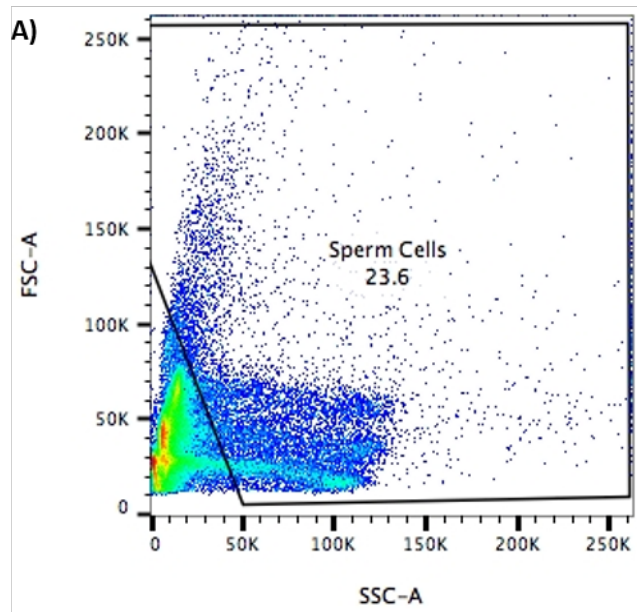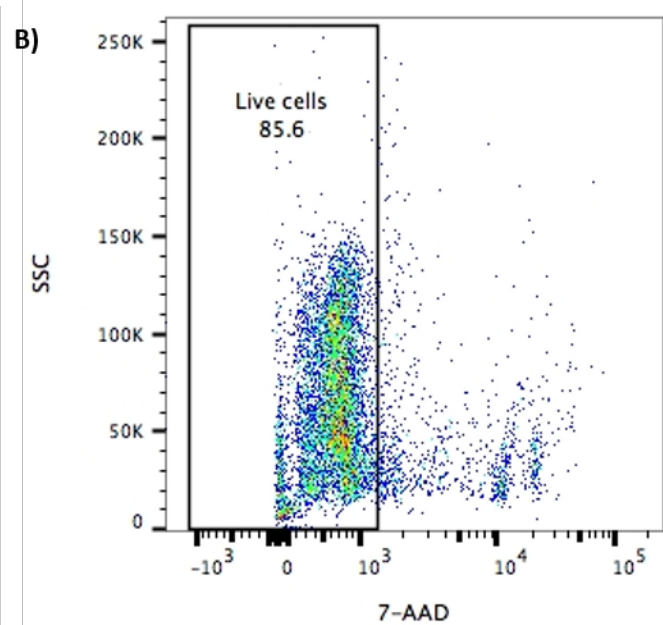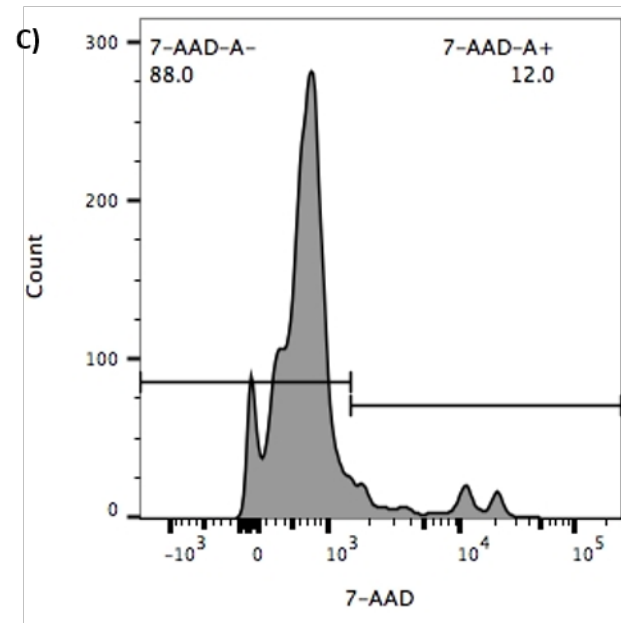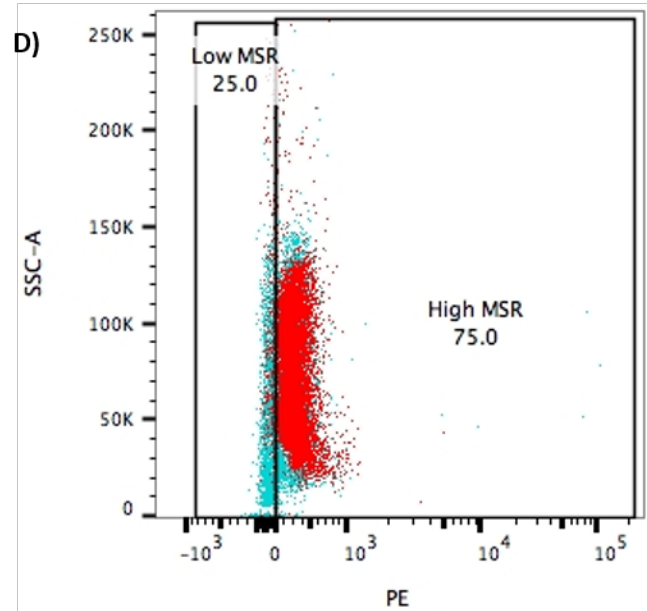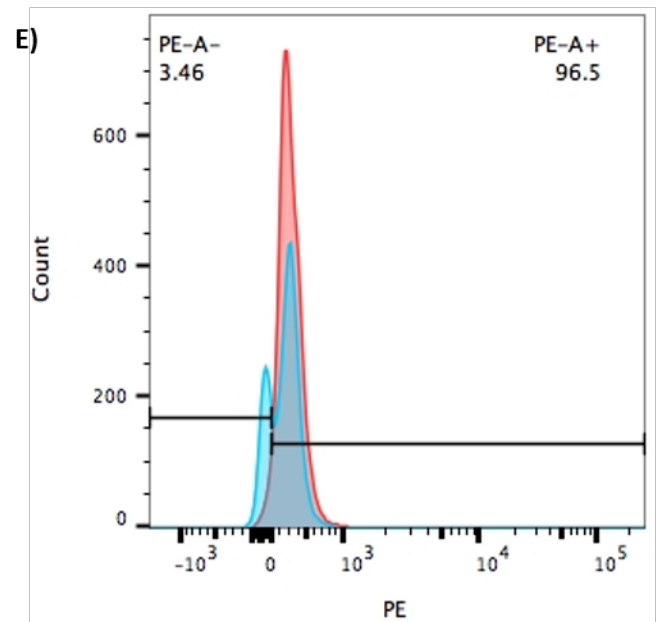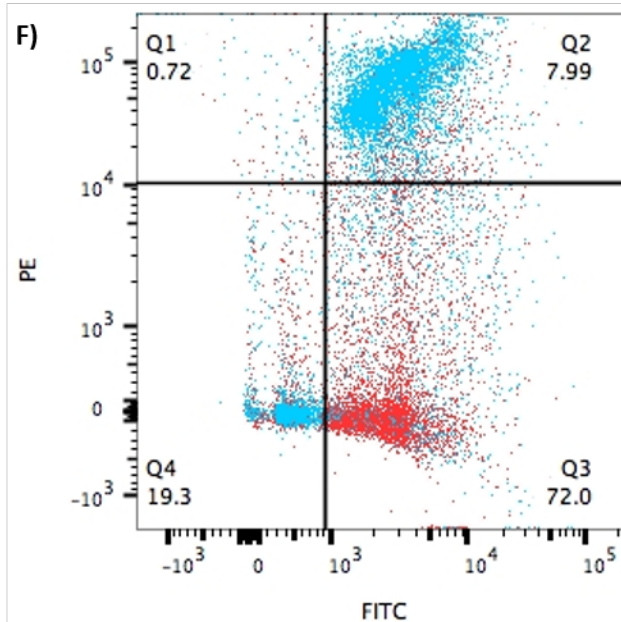

Supplement: supplementary_figure_1.pdf [file supplementary_figure_1.pdf]
