# Supplementary material for: Impacts of obesity, maternal obesity and nicotinamide mononucleotide supplementation on sperm quality in mice
Source: PubMed Central journal article supplement (PMC6589912; doi:10.1530/rep-18-0574), 2019-05-30
Supplement: supplementary_table_1.pdf [file supplementary_table_1.pdf]

**Mitochondrial membrane potential**

| Components                           | Test (J7) | Positive control (J7F) |
|--------------------------------------|-----------|------------------------|
| Sperm aliquot (10 <sup>6</sup> /mL)  | 190μL     | 190μL                  |
| 7-AAD (concentration is proprietary) | 4μL       | 4μL                    |
| JC-1 (1mM)                           | 4μL       | 4μL                    |
| FCCP (10mM) in DMSO                  | -         | 1μL                    |
| DMSO                                 | 1μL       | -                      |

**Oxidative Stress**

| Components                           | Test (M7) | Positive control (M7AA) |
|--------------------------------------|-----------|-------------------------|
| Sperm aliquot (10 <sup>6</sup> /mL)  | 190μL     | 190μL                   |
| 7-AAD (concentration is proprietary) | 4μL       | 4μL                     |
| MSR (50μg in 13μL DMSO)              | 4μL       | 4μL                     |
| AA (50mM) in EtOH                    | -         | 4μL                     |
| Ethanol                              | 4μL       | -                       |

**Supplementary table 1. Values and concentrations of tube contents for mouse FACS experiments (Oral Administration Cohort).** To assess MMP in viable sperm cells JC-1 and 7-AAD was added into the sperm aliquot. Carbonyl cyanide-trifluoromethoxyphenylhydrazone (FCCP) was added as a positive control. DMSO was added as vehicle.

To assess oxidative stress in live sperm cells, MSR and 7-AAD were added into the sperm aliquot. Arachidonic acid (AA) was added as a positive control. Ethanol was added as vehicle.
