# Supplementary material for: Impacts of obesity, maternal obesity and nicotinamide mononucleotide supplementation on sperm quality in mice
Source: PubMed Central journal article supplement (PMC6589912; doi:10.1530/rep-18-0574), 2019-05-30
Supplement: supplementary_table_2.pdf [file supplementary_table_2.pdf]

| Treatment Group                                     | CCV           | CCN           | CHV           | CHN           | HCV           | HCN           | HHV           | HHN           |
|-----------------------------------------------------|---------------|---------------|---------------|---------------|---------------|---------------|---------------|---------------|
| Body length (cm) n=5-12                             | 9.00±0.08     | 9.12±0.06     | 9.61±0.07     | 9.63±0.08     | 9.13±0.09     | 9.08±0.09     | 9.78±0.08     | 9.51±0.10     |
| Testis weight / body length n=5-12                  | 0.0197±0.0005 | 0.0202±0.0005 | 0.0197±0.0007 | 0.0198±0.0003 | 0.0217±0.0005 | 0.0222±0.0003 | 0.0206±0.0006 | 0.0216±0.0005 |
| mtDNA copy number relative to average of CCV n=9-12 | 1.00±0.12     | 1.25±0.12     | 0.77±0.08     | 0.82±0.08     | 1.14±0.09     | 0.88±0.06     | 0.82±0.06     | 0.67±0.06     |
| Halo (%) n=6-11                                     | 37.3±16.7     | 33.6±14.7     | 22.7±10.8     | 32.4±11.7     | 61.0±19.8     | 36.8±11.6     | 39.0±12.9     | 22.7±11.0     |
| CMA3 (%) n=6-11                                     | 2.2±0.8       | 2.9±0.8       | 2.9±0.4       | 2.1±0.5       | 4.8±1.6       | 3.6±0.9       | 3.3±0.9       | 4.2±0.8       |
| SCSA (% DFI) n=6-11                                 | 29.2±0.8      | 29.0±0.5      | 29.5±0.8      | 30.2±0.8      | 30.1±0.6      | 29.8±0.5      | 30.7±0.8      | 31.9±0.9      |

### 3-way ANOVA outcome

| Treatment Group                                     | Main effects  |                     |     | Interactions       |                   |               |
|-----------------------------------------------------|---------------|---------------------|-----|--------------------|-------------------|---------------|
|                                                     | Maternal diet | Post-weaning diet   | NMN | Mat Diet *<br>Diet | Mat Diet *<br>NMN | Diet *<br>NMN |
| Body length (cm) n=5-12                             |               | 4x10 <sup>-11</sup> |     |                    |                   |               |
| Testis weight / body length n=5-12                  | <0.0001       |                     |     |                    |                   |               |
| mtDNA copy number relative to average of CCV n=9-12 |               | <0.0001             |     |                    | <0.01             |               |
| Halo (%) n=6-11                                     |               |                     |     |                    |                   |               |
| CMA3 (%) n=6-11                                     | <0.01         |                     |     |                    |                   |               |
| SCSA (% DFI) n=6-11                                 | <0.05         | 0.06                |     |                    |                   |               |

**Supplementary table 2. Effects of maternal obesity, offspring HFD and intraperitoneal NMN treatment on anthropometric and sperm parameters in mouse offspring, Maternal Obesity Cohort.** The top section displays the group mean and SEM parameter for various parameters. The bottom section of the table displays P values from a three way ANOVA that was used to compare all 8 groups where maternal diet, post-weaning diet and treatment were three different factors. The first letter of the group code indicates maternal diet, chow (C) or HFD (H). The second letter indicates offspring post-weaning diet, chow (C) or HFD (H). The third letter indicates NMN (N) or vehicle (V) injection.
