# Supplementary material for: Impacts of obesity, maternal obesity and nicotinamide mononucleotide supplementation on sperm quality in mice
Source: PubMed Central journal article supplement (PMC6589912; doi:10.1530/rep-18-0574), 2019-05-30
Supplement: supplementary_table_3.pdf [file supplementary_table_3.pdf]

| Treatment Group                                          | Vehicle                    | NMN                        | T-test V vs N |
|----------------------------------------------------------|----------------------------|----------------------------|---------------|
| Body weight (g) n=11-13                                  | 35.7±1.0 min 30.6 max 42.0 | 36.2±1.0 min 30.1 max 40.6 | P=0.28        |
| Sperm count (per ml x10 <sup>5</sup> ) n=11-13           | 44.4±3.2 min 28.0 max 60.0 | 46.8±3.6 min 25.0 max 65.0 | P=0.23        |
| Motile (%) n=9-10                                        | 25.6±3.3 min 6.7 max 40.0  | 13.0±3.5 min 1.0 max 35.0  | P=0.13        |
| mtDNA copy number relative to average of Vehicle n=11-12 | 1±0.06 min 0.8 max 1.3     | 0.94±0.02 min 0.8 max 1.0  | P=0.51        |

Supplementary table 3. Effects of mouse oral NMN treatment on anthropometric and sperm parameters (Oral Administration Cohort).
